# Supplementary material for: Calibration and XGBoost reweighting to reduce coverage and non-response biases in overlapping panel surveys: Application to the Healthcare and Social Survey
Source: Research Square preprint supplement (doi:10.21203/rs.3.rs-3072394/v1), 2023-07-12
Supplement: Supplementary file 1 [file 17d339ebc8f6340c9f1d2163.xlsx]

## Sheet: Table 1
Age group (years)	Self-perceived general health (measurement 4)	Total					Men					Women
		sample size			Confidence Interval 95%		sample size			Confidence Interval 95%		sample size			Confidence Interval 95%
			Population	Percentage	lower limit	upper limit		Population	Percentage	lower limit	upper limit		Population	Percentage	lower limit	upper limit
Total	Excelent	339	859840	12.2%	10.8%	13.5%	184	515233	14.9%	12.8%	17.3%	155	344606	9.6%	8.2%	11.1%
	Very good	585	1479074	21.0%	19.4%	22.9%	287	806092	23.4%	20.5%	26.3%	298	672982	18.7%	16.6%	21.1%
	Good	1500	3351578	47.5%	45.6%	49.5%	671	1635522	47.4%	44.4%	50.6%	829	1716055	47.6%	44.6%	50.1%
	Fair	501	1136532	16.1%	14.7%	17.8%	166	420768	12.2%	10.3%	14.6%	335	715764	19.9%	17.7%	21.9%
	Bad	80	224960	3.2%	2.3%	5.3%	31	71886	2.1%	1.4%	3.0%	49	153074	4.2%	2.8%	7.9%
	Total	3005	7051983	100%			1339	3449501	100%			1666	3602481	100%
16-24	Excelent	65	225718	22.3%	17.3%	27.4%	29	123412	24.5%	17.4%	33.4%	36	102306	20.2%	14.7%	27.3%
	Very good	117	421099	41.7%	36.0%	47.7%	51	225547	44.7%	35.4%	54.5%	66	195552	38.6%	31.6%	47.8%
	Good	99	336706	33.3%	27.8%	39.1%	31	143158	28.4%	20.1%	38.4%	68	193548	38.2%	30.5%	45.3%
	Fair	6	20933	2.1%	0.7%	4.4%	2	8099	1.6%	0.0%	5.5%	4	12834	2.5%	0.7%	6.5%
	Bad	2	6511	0.6%	0.0%	2.4%	1	4443	0.9%	0.0%	5.2%	1	2068	0.4%	0.0%	2.5%
	Total	289	1010967	100%			114	504658	100%			175	506309	100%
25-34	Excelent	91	232072	20.7%	16.8%	25.0%	49	142551	23.8%	18.1%	30.5%	42	89522	17.0%	12.7%	22.0%
	Very good	116	330354	29.4%	24.5%	35.8%	53	176158	29.5%	21.9%	40.2%	63	154197	29.3%	23.3%	35.9%
	Good	177	465040	41.4%	35.9%	47.0%	71	231395	38.7%	30.1%	49.1%	106	233645	44.5%	38.1%	51.5%
	Fair	33	86805	7.7%	5.4%	10.7%	15	42046	7.0%	4.0%	11.2%	18	44759	8.5%	5.4%	13.5%
	Bad	3	8992	0.8%	0.2%	2.3%	2	5559	0.9%	0.0%	3.4%	1	3433	0.7%	0.0%	3.5%
	Total	420	1123264	100%			190	597708	100%			230	525556	100%
35-44	Excelent	85	187694	13.5%	10.8%	16.9%	42	105327	15.5%	10.8%	22.3%	43	82368	11.6%	8.6%	15.2%
	Very good	144	304027	21.8%	18.6%	25.6%	66	157588	23.2%	18.3%	30.4%	78	146439	20.6%	16.7%	24.9%
	Good	339	713462	51.3%	47.0%	55.8%	142	344818	50.8%	43.7%	58.7%	197	368643	51.8%	46.5%	56.8%
	Fair	79	175602	12.6%	10.0%	16.3%	24	69438	10.2%	6.4%	17.7%	55	106163	14.9%	11.6%	19.0%
	Bad	6	10687	0.8%	0.3%	1.5%	1	2192	0.3%	0.0%	2.0%	5	8495	1.2%	0.5%	2.6%
	Total	653	1391473	100%			275	679364	100%			378	712108	100%
45-54	Excelent	48	91536	7.0%	5.2%	9.2%	28	55582	8.6%	5.9%	12.2%	20	35954	5.5%	3.4%	8.4%
	Very good	117	230748	17.8%	14.9%	21.0%	70	146207	22.7%	18.4%	28.2%	47	84541	12.9%	9.6%	16.7%
	Good	377	716330	55.1%	51.3%	59.3%	170	360177	56.0%	50.3%	62.1%	207	356152	54.2%	49.3%	58.9%
	Fair	126	227058	17.5%	14.7%	20.3%	35	65798	10.2%	7.1%	13.5%	91	161260	24.5%	20.4%	28.9%
	Bad	19	33986	2.6%	1.6%	4.1%	8	14987	2.3%	1.0%	4.4%	11	18999	2.9%	1.5%	5.2%
	Total	687	1299658	100%			311	642751	100%			376	656906	100%
55-64	Excelent	30	63636	6.3%	4.4%	9.5%	21	40176	8.1%	4.8%	12.0%	9	23459	4.6%	2.0%	10.4%
	Very good	58	109108	10.8%	8.1%	13.5%	29	54399	11.0%	7.5%	15.4%	29	54709	10.7%	7.6%	15.0%
	Good	281	530948	52.7%	48.2%	57.0%	149	276078	55.8%	49.6%	62.4%	132	254870	49.7%	42.9%	55.9%
	Fair	134	269347	26.7%	23.1%	31.4%	52	107822	21.8%	16.5%	28.4%	82	161524	31.5%	25.2%	37.3%
	Bad	19	34672	3.4%	2.1%	5.2%	9	16048	3.2%	1.6%	6.0%	10	18623	3.6%	1.9%	6.8%
	Total	522	1007710	100%			260	494524	100%			262	513185	100%
>=65	Excelent	20	59183	4.9%	2.9%	8.9%	15	48185	9.1%	4.9%	17.3%	5	10998	1.6%	0.6%	3.8%
	Very good	33	83738	6.9%	4.8%	9.6%	18	46194	8.7%	5.3%	13.4%	15	37544	5.5%	3.1%	9.1%
	Good	227	589092	48.3%	41.8%	53.7%	108	279897	52.8%	44.5%	61.2%	119	309195	44.9%	35.6%	52.3%
	Fair	123	356788	29.3%	24.6%	34.5%	38	127564	24.0%	17.2%	32.9%	85	229224	33.3%	26.2%	40.3%
	Bad	31	130111	10.7%	6.5%	21.4%	10	28656	5.4%	2.7%	9.7%	21	101455	14.7%	7.5%	32.3%
	Total	434	1218912	100%			189	530496	100%			245	688415	100%
