# Supplementary material for: Calibration and XGBoost reweighting to reduce coverage and non-response biases in overlapping panel surveys: Application to the Healthcare and Social Survey
Source: Research Square preprint supplement (doi:10.21203/rs.3.rs-3072394/v1), 2023-07-12
Supplement: Supplementary file 2 [file 4921a11dd2c6574b6e1df428.xlsx]

## Sheet: Table 4
Age group (years)	Self-perceived general health	Total			Men			Women			Absolute gender gap (change in percentage points: Women - Men)			Relative gender gap (percentages change rate: Women / Men)
		M2-M1	M3-M2	M4-M3	M2-M1	M3-M2	M4-M3	M2-M1	M3-M2	M4-M3	M2-M1	M3-M2	M4-M3	M2-M1	M3-M2	M4-M3
		Percentage (CI95%)	Percentage (CI95%)	Percentage (CI95%)	Percentage (CI95%)	Percentage (CI95%)	Percentage (CI95%)	Percentage (CI95%)	Percentage (CI95%)	Percentage (CI95%)	Percentage (CI95%)	Percentage (CI95%)	Percentage (CI95%)	Percentage (CI95%)	Percentage (CI95%)	Percentage (CI95%)
Total	Health improves	21.7%	20.9%	18.4%	20.5%	24.0%	19.3%	22.8%	17.9%	17.5%	2.3	-6.0	-1.8	11.0%	-25.1%	-9.2%
		19.4; 24.3	18.8; 23.6	16.6; 20.2	17.5; 25.0	20.9; 28.4	16.6; 22.3	20.2; 25.8	15.2; 21.2	15.4; 19.7	-2.5; 6.8	-11.1; -1.4	-5.3; 1.7	-11.1; 38.7	-40.2; -6.0	-24.8; 10.2
	Remains the same	54.5%	54.2%	57.0%	54.6%	53.5%	57.7%	54.4%	54.8%	56.3%	-0.2	1.3	-1.4	-0.4%	2.4%	-2.4%
		51.8; 56.9	51.3; 56.9	54.6; 59.1	50.2; 58.5	49.1; 57.5	54.2; 60.9	51.5; 57.8	51.2; 57.8	53.3; 59.1	-5.3; 5.0	-4.7; 6.3	-5.8; 3.5	-9.1; 9.9	-8.3; 12.6	-9.7; 6.4
	Health deteriorates	23.8%	25.0%	24.7%	24.9%	22.5%	23.0%	22.8%	27.3%	26.2%	-2.0	4.7	3.2	-8.2%	20.9%	13.8%
		21.7; 26.1	22.7; 27.3	22.7; 26.6	21.7; 28.8	19.8; 26.1	20.3; 25.9	20.2; 25.3	24.4; 30.3	23.7; 29.3	-6.6; 1.8	0.4; 9.2	-1.0; 7.6	-24.5; 7.9	1.4; 45.8	-4.2; 36.8
16-24	Health improves	29.9%	22.5%	24.6%	24.2%	30.5%	18.5%	36.1%	14.2%	30.7%	11.9	-16.3	12.1	49.4%	-53.3%	65.5%
		24.3; 36.2	17.2; 28.7	19.1; 31.1	17.0; 32.2	21.9; 41.7	11.5; 26.7	28.0; 46.2	8.8; 21.2	22.6; 39.5	-0.2; 23.7	-29.4; -4.9	-0.5; 23.5	-3.1; 119.8	-74.4; -18.3	0.5; 191.9
	Remains the same	44.0%	54.1%	55.9%	46.6%	53.6%	60.8%	41.3%	54.6%	50.9%	-5.3	1.0	-9.9	-11.4%	1.9%	-16.2%
		37.6; 50.6	46.8; 61.4	48.9; 62.7	36.9; 55.9	42.7; 63.6	50.4; 70.7	32.9; 50.3	45.2; 64.1	42.3; 58.9	-18.3; 7.1	-13.5; 15.5	-22.6; 4.2	-34.5; 17.7	-22.4; 34.1	-33.6; 7.7
	Health deteriorates	26.0%	23.4%	19.5%	29.2%	15.9%	20.7%	22.6%	31.1%	18.4%	-6.6	15.3	-2.3	-22.7%	96.0%	-11.0%
		20.8; 31.9	17.5; 29.2	14.8; 25.4	21.3; 38.9	9.1; 25.5	13.6; 30.0	16.2; 30.8	22.2; 40.9	12.7; 26.0	-17.8; 4.7	3.2; 27.8	-14.1; 7.8	-49.7; 21.8	14.1; 275.7	-50.9; 53.0
25-34	Health improves	20.4%	25.5%	19.6%	18.2%	31.3%	21.3%	22.6%	19.0%	17.6%	4.5	-12.3	-3.7	24.7%	-39.4%	-17.2%
		14.9; 29.9	19.5; 35.3	15.0; 25.0	10.1; 33.8	21.7; 47.6	14.3; 29.5	15.4; 30.9	12.3; 26.4	12.8; 23.1	-14.1; 15.0	-29.6; -0.3	-12.5; 6.0	-50.3; 114.4	-66.9; 1.7	-47.1; 36.0
	Remains the same	55.9%	48.4%	56.0%	58.8%	43.8%	55.8%	52.8%	53.7%	56.1%	-5.9	10.0	0.3	-10.1%	22.8%	0.5%
		48.6; 62.6	40.4; 54.8	49.9; 63.1	46.6; 68.6	32.1; 53.5	45.8; 66.7	44.5; 62.0	45.0; 63.2	48.9; 62.6	-19.9; 8.6	-4.5; 24.1	-13.1; 11.2	-30.5; 17.1	-8.2; 70.0	-20.5; 23.4
	Health deteriorates	23.8%	26.0%	24.5%	23.0%	24.9%	22.9%	24.5%	27.3%	26.3%	1.5	2.4	3.4	6.4%	9.5%	14.7%
		18.1; 29.2	20.3; 33.0	19.5; 30.0	15.6; 31.0	15.9; 35.8	16.2; 31.4	17.4; 33.7	20.0; 34.7	20.9; 33.7	-9.9; 13.6	-11.3; 13.9	-6.1; 13.3	-33.2; 84.0	-34.6; 83.9	-21.1; 77.6
35-44	Health improves	22.1%	18.0%	15.9%	21.1%	18.5%	13.9%	23.1%	17.4%	17.8%	2.0	-1.1	4.0	9.7%	-5.8%	28.7%
		17.3; 30.6	14.2; 22.5	12.8; 19.7	13.8; 36.4	12.8; 25.0	9.4; 19.4	18.2; 29.4	13.2; 23.4	13.6; 22.7	-14.7; 11.0	-8.8; 7.0	-3.1; 10.9	-44.8; 76.0	-37.8; 52.7	-15.9; 108.6
	Remains the same	56.1%	53.0%	57.4%	55.2%	56.0%	61.9%	57.0%	50.2%	53.1%	1.8	-5.8	-8.8	3.3%	-10.4%	-14.2%
		49.0; 62.7	47.2; 58.7	52.4; 61.8	42.8; 65.2	46.9; 64.8	54.4; 69.9	49.5; 62.8	43.1; 56.2	47.4; 58.9	-9.3; 15.6	-17.2; 4.1	-18.6; 0.7	-14.9; 34.3	-27.5; 8.3	-27.6; 1.4
	Health deteriorates	21.8%	29.1%	26.7%	23.7%	25.5%	24.3%	19.9%	32.4%	29.1%	-3.8	6.9	4.8	-16.2%	27.1%	19.9%
		17.0; 28.6	24.4; 34.2	22.9; 30.9	16.7; 35.9	18.4; 33.8	18.1; 30.8	14.9; 25.4	26.3; 38.6	24.0; 34.5	-17.4; 4.3	-2.8; 16.6	-5.0; 12.6	-53.2; 25.1	-9.5; 87.7	-15.2; 66.0
45-54	Health improves	20.8%	16.9%	17.9%	19.5%	21.3%	22.1%	21.9%	12.7%	14.0%	2.4	-8.5	-8.1	12.2%	-40.1%	-36.8%
		17.2; 24.5	13.5; 20.6	14.6; 22.9	14.1; 26.1	16.0; 26.8	16.9; 30.3	16.8; 27.4	9.0; 17.6	10.3; 18.0	-5.1; 10.2	-16.1; -1.8	-16.6; -1.0	-22.7; 65.7	-61.5; -7.4	-58.3; -5.4
	Remains the same	59.3%	59.9%	55.6%	57.7%	55.3%	53.8%	60.8%	64.1%	57.3%	3.1	8.8	3.5	5.4%	15.9%	6.5%
		54.8; 64.3	54.9; 64.9	50.8; 60.0	50.2; 64.7	47.0; 62.6	46.9; 60.8	54.0; 66.7	58.3; 70.6	51.9; 63.1	-6.9; 11.6	-0.6; 19.6	-5.3; 12.8	-11.3; 22.2	-1.1; 40.1	-8.9; 26.5
	Health deteriorates	19.9%	23.2%	26.4%	22.8%	23.4%	24.1%	17.3%	23.1%	28.7%	-5.5	-0.3	4.6	-24.0%	-1.1%	19.3%
		16.2; 23.6	19.1; 28.3	22.8; 30.3	16.9; 29.1	17.5; 34.2	18.9; 30.5	12.7; 22.8	17.3; 28.5	23.8; 33.9	-13.2; 1.8	-10.6; 7.7	-3.2; 11.9	-48.8; 9.6	-36.1; 42.4	-10.9; 60.0
55-64	Health improves	17.3%	18.7%	15.8%	20.7%	22.5%	15.0%	14.1%	14.6%	16.5%	-6.6	-7.9	1.4	-32.1%	-35.0%	9.5%
		13.1; 22.3	14.5; 23.2	12.8; 19.8	14.2; 30.0	16.4; 29.5	11.0; 20.8	9.3; 19.6	9.6; 21.7	11.7; 22.3	-17.7; 1.4	-16.7; 1.1	-5.0; 8.7	-63.1; 11.9	-62.2; 6.5	-28.5; 77.3
	Remains the same	55.6%	57.0%	62.5%	50.8%	55.7%	61.2%	60.1%	58.5%	63.7%	9.3	2.8	2.5	18.3%	5.0%	4.0%
		49.1; 61.0	51.8; 63.3	57.3; 67.0	41.6; 58.9	47.7; 63.3	53.9; 67.9	52.6; 67.5	49.6; 65.9	56.2; 70.0	-2.2; 21.5	-9.8; 13.7	-7.7; 11.3	-3.9; 49.5	-16.0; 27.3	-11.5; 20.1
	Health deteriorates	27.1%	24.3%	21.8%	28.5%	21.8%	23.7%	25.8%	26.9%	19.9%	-2.6	5.1	-3.9	-9.3%	23.2%	-16.4%
		22.4; 33.7	19.5; 29.2	17.9; 26.0	21.1; 38.4	15.8; 28.7	18.1; 30.3	19.8; 34.3	19.8; 34.9	14.7; 26.0	-14.4; 8.1	-4.3; 15.6	-11.1; 4.6	-41.0; 37.5	-17.9; 87.3	-41.2; 25.1
>=65	Health improves	20.5%	25.0%	17.6%	19.7%	21.4%	25.2%	21.1%	27.6%	11.7%	1.4	6.3	-13.5	7.0%	29.3%	-53.5%
		15.9; 26.5	18.8; 34.5	13.3; 22.8	13.2; 29.1	12.6; 32.5	18.1; 34.6	14.5; 29.0	18.6; 40.3	7.9; 18.0	-9.0; 12.6	-8.7; 20.1	-24.1; -4.8	-35.8; 89.8	-33.7; 135.4	-71.9; -21.6
	Remains the same	53.6%	52.0%	55.1%	56.9%	56.6%	52.8%	51.1%	48.7%	57.0%	-5.8	-7.9	4.2	-10.1%	-13.9%	8.0%
		47.6; 60.6	43.9; 59.5	47.7; 61.0	47.0; 67.0	45.7; 69.8	44.0; 61.5	43.4; 59.4	38.7; 58.2	47.7; 64.9	-19.4; 6.6	-22.7; 8.3	-8.3; 17.0	-29.6; 13.9	-35.5; 17.2	-13.8; 36.5
	Health deteriorates	25.9%	23.0%	27.2%	23.4%	22.1%	22.0%	27.8%	23.7%	31.3%	4.4	1.6	9.2	18.8%	7.3%	42.0%
		20.3; 32.0	17.7; 28.3	22.0; 35.1	16.4; 33.7	13.7; 31.1	14.7; 31.3	21.2; 35.7	17.3; 30.8	23.3; 42.4	-6.5; 15.8	-9.2; 12.6	-2.5; 22.2	-23.1; 93.4	-32.1; 76.6	-13.9; 127.7
