# Supplementary material for: Calibration and XGBoost reweighting to reduce coverage and non-response biases in overlapping panel surveys: Application to the Healthcare and Social Survey
Source: Research Square preprint supplement (doi:10.21203/rs.3.rs-3072394/v1), 2023-07-12
Supplement: Supplementary file 3 [file 9daa84f9ddfc3eb98626930f.xlsx]

## Sheet: Table 2
General health self-perception: fair or poor (Age group)	Total (percentage and confidence interval 95%)				Men (percentage and confidence interval 95%)				Women (percentage and confidence interval 95%)				Absolute Gender gap (percentage points and confidence interval 95%)				Relative Gender gap (percentage points and confidence interval 95%)
	M1	M2	M3	M4	M1	M2	M3	M4	M1	M2	M3	M4	M1	M2	M3	M4	M1	M2	M3	M4
Total	0.161	0.146	0.159	0.193	0.121	0.112	0.124	0.143	0.199	0.178	0.193	0.241	7.7	6.6	6.8	9.8	63.8%	59.0%	55.1%	68.9%
	14,7; 17,7	13,3; 16,3	14,6; 17,6	17,7; 21,3	10,3; 14,4	9,3; 14,1	10,5; 14,9	12,3; 16,7	17,9; 22,0	15,8; 20,2	17,4; 21,2	21,9; 27,5	4.9; 10.6	3.3; 9.6	3.9; 9.5	6.2; 13.5	33.9; 98.9	24.3; 99.8	28.5; 87.7	37.6; 106.9
16-24	0.065	0.029	0.034	0.027	0.036	0.032	0.019	0.025	0.098	0.025	0.049	0.029	6.2	-0.8	3.1	0.5	171.6%	-23.3%	165.0%	18.4%
	4,2; 10,0	1,2; 5,9	1,9; 5,5	1,0; 5,1	1,6; 6,9	0,9; 7,9	0,6; 5,3	0,7; 7,0	6,1; 15,9	0,7; 6,7	2,4; 8,4	1,0; 6,9	1.3; 12.6	-5.3; 3.0	-0.3; 6.7	-3.5; 4.1	-0.4; 760.3	nan; nan	-28.9; 918.4	nan; nan
25-34	0.071	0.034	0.057	0.085	0.064	0.021	0.032	0.08	0.08	0.049	0.083	0.092	1.6	2.7	5.1	1.2	25.2%	128.2%	156.7%	15.1%
	5,1; 10,6	1,8; 5,9	3,8; 8,1	6,1; 11,7	3,2; 12,1	0,5; 5,3	1,4; 6,5	4,6; 12,3	4,6; 12,5	2,1; 10,1	5,3; 12,7	5,6; 14,0	-4.2; 7.0	-0.8; 7.6	0.8; 9.6	-4.0; 6.7	-44.3; 187.3	-41.2; 1107.2	3.0; 619.8	-42.2; 122.2
35-44	0.094	0.068	0.077	0.134	0.077	0.063	0.047	0.105	0.11	0.073	0.106	0.161	3.3	1.0	5.9	5.6	42.6%	15.8%	123.6%	52.7%
	7,1; 11,9	4,9; 9,3	5,9; 10,1	10,6; 17,1	4,8; 11,5	3,6; 10,0	2,8; 7,7	6,6; 18,0	7,8; 14,7	4,9; 11,2	7,9; 14,4	12,6; 20,4	-1.9; 7.9	-3.2; 5.2	1.7; 9.9	-1.9; 11.0	-18.6; 151.4	-39.3; 116.8	20.1; 337.2	-17.8; 144.6
45-54	0.163	0.133	0.166	0.201	0.124	0.084	0.127	0.126	0.199	0.178	0.203	0.274	7.5	9.4	7.6	14.9	61.0%	111.8%	59.4%	118.3%
	13,6; 20,4	10,7; 16,6	13,9; 19,8	17,1; 23,2	8,6; 19,7	5,5; 12,1	9,1; 17,9	9,0; 16,1	15,9; 24,5	13,8; 22,2	16,2; 24,7	23,0; 32,0	-0.7; 13.1	3.8; 14.5	1.4; 13.2	8.7; 20.3	-7.0; 148.2	36.9; 245.1	6.9; 135.5	56.2; 201.6
55-64	0.214	0.228	0.245	0.302	0.175	0.192	0.194	0.25	0.255	0.262	0.296	0.351	8.0	7.1	10.2	10.1	45.9%	36.9%	52.9%	40.1%
	17,9; 26,7	18,5; 27,8	20,5; 28,4	26,1; 34,7	12,0; 25,6	13,2; 26,4	14,7; 26,1	19,2; 31,7	20,5; 31,7	20,8; 33,2	24,0; 35,6	28,7; 41,3	-1.2; 15.8	-2.6; 14.8	2.1; 18.9	0.8; 18.2	-8.2; 114.7	-13.3; 98.9	8.2; 120.7	2.4; 87.4
>=65	0.338	0.369	0.374	0.399	0.263	0.304	0.358	0.294	0.393	0.419	0.386	0.48	13.0	11.5	2.8	18.6	49.4%	38.0%	7.8%	63.1%
	29,7; 38,3	31,9; 42,6	32,3; 42,9	34,8; 47,4	20,2; 34,1	22,7; 40,7	27,9; 45,2	21,8; 37,9	34,2; 45,6	34,9; 49,5	31,9; 44,7	40,7; 58,3	4.2; 22.0	-0.3; 22.8	-8.8; 12.9	8.1; 31.2	11.6; 106.6	-1.2; 99.0	-20.1; 43.0	19.0; 125.6
