# Supplementary material for: Calibration and XGBoost reweighting to reduce coverage and non-response biases in overlapping panel surveys: Application to the Healthcare and Social Survey
Source: Research Square preprint supplement (doi:10.21203/rs.3.rs-3072394/v1), 2023-07-12
Supplement: Supplementary file 4 [file b7dbb6558d91847fd45a2578.xlsx]

## Sheet: Table 5
NAME	TABLE	FIGURE	FORMULA	INTERPRETATION
Original variables	1	4	(10)	Percentages, confidence intervals at 95%, sample size and population estimations at measurement 4, grouped by sex and age, for the original categories of self-perceived general health.
Dichotomized variables	2	5	(10)	Evolution of percentages and confidence intervals at 95%, grouped by sex and age, of people with fair or poor self-perceived general health. If the confidence intervals for the same measurement do not overlap, it can be said that there are statistically significant differences between women and men. Similarly, if the confidence intervals of two different measurements do not overlap, it can be sai…
Absolute/Relative change	No/3	6	(13)/(14)	Evolution of absolute/relative changes and confidence intervals at 95%, grouped by sex and age, of people with fair or poor self-perceived general health in each measurement compared to measurement 1. A positive value indicates an increase, in percentage points/terms, in the fair or poor self-perception of overall health of the corresponding measure compared to the first measure. Conversely, a ne…
Absolute/Relative gender gap	2	7	(15)/(16)	Evolution in each measurement (M) of absolute/relative gender gaps (women versus men) and confidence intervals at 95%, grouped by age, of people with fair or poor self-perceived general health. A positive value indicates that women show, in percentage points/terms, a larger value in comparison to men in their 'fair or poor' self-perceived general health of the corresponding measurement. Therefore…
