# Supplementary material for: Calibration and XGBoost reweighting to reduce coverage and non-response biases in overlapping panel surveys: Application to the Healthcare and Social Survey
Source: Research Square preprint supplement (doi:10.21203/rs.3.rs-3072394/v1), 2023-07-12
Supplement: Supplementary file 5 [file e13bae6a8a6a06d5a59d8447.xlsx]

## Sheet: Table 6
NAME	TABLE	FIGURE	FORMULA	INTERPRETATION
Longitudinal difference	4	8	(19)	Percentage of population and confidence intervals at 95% whose self-perceived general health increases/improves, decreases/deteriorates or remains the same between a measurement and the previous one
Decrease Increase Rate	No	9	(20)	Percentage of the population and confidence intervals at 95% that worsens their general health (in a given measurement compared to the previous one) and the population that improves it. A positive value means that there are more people whose self-perceived general health has deteriorated than people whose health has improved.
Absolute/Relative gender gap in the absolute difference	4	10	(21)/(22)	Absolute/Relative difference (in percentage points/terms) and confidence intervals at 95% between women and men with better, equal or worse self-perceived health in a measurement compared to the previous one. A positive value indicates that the percentage of the female population with improved, equal or worsened self-perceived general health was greater than the corresponding percentage in the ma…
