# Supplementary material for: Calibration and XGBoost reweighting to reduce coverage and non-response biases in overlapping panel surveys: Application to the Healthcare and Social Survey
Source: Research Square preprint supplement (doi:10.21203/rs.3.rs-3072394/v1), 2023-07-12
Supplement: Supplementary file 6 [file e47bdcc6a28a496e361c3b31.xlsx]

## Sheet: Table 3
General health self-perception: fair or poor (Age group)	Total (percentage and confidence interval 95%)			Men (percentage and confidence interval 95%)			Women (percentage and confidence interval 95%)
	M2 / M1	M3 / M1	M4 / M1	M2 / M1	M3 / M1	M4 / M1	M2 / M1	M3 / M1	M4 / M1
Total	-9.3%	-1.0%	20.0%	-7.6%	2.5%	17.7%	-10.3%	-3.0%	21.3%
	-21.1; 3.5	-13.5; 13.7	5.2; 35.7	-28.7; 20.4	-19.0; 32.7	-7.8; 45.6	-22.3; 7.3	-15.7; 12.2	5.6; 43.3
16-24	-56.1%	-48.3%	-58.4%	-10.2%	-48.4%	-30.9%	-74.6%	-49.7%	-69.9%
	-83.9; 5.3	-74.8; 5.7	-85.1; -8.0	-81.6; 271.1	-100.0; 135.5	nan; nan	-95.0; -15.7	-80.1; 14.6	-91.6; -6.8
25-34	-52.0%	-20.9%	19.3%	-66.6%	-49.1%	24.9%	-39.2%	4.3%	14.8%
	-78.1; -5.0	-57.4; 31.1	-28.6; 97.3	-93.6; 17.3	-85.5; 56.2	-48.5; 165.7	-76.9; 44.4	-51.0; 95.7	-43.1; 116.9
35-44	-27.2%	-17.2%	43.1%	-18.1%	-38.4%	37.0%	-33.4%	-3.4%	46.8%
	-51.0; 10.9	-46.2; 18.1	4.5; 103.1	-61.6; 50.4	-71.1; 27.0	-27.8; 193.8	-62.0; 9.9	-36.3; 57.4	0.7; 122.1
45-54	-18.4%	1.8%	23.2%	-32.0%	3.1%	1.7%	-10.5%	2.1%	37.9%
	-38.2; 8.9	-23.3; 32.2	-6.1; 57.8	-63.4; 19.5	-42.2; 69.1	-41.3; 61.0	-36.5; 23.4	-24.0; 35.3	5.3; 83.4
55-64	6.2%	14.3%	40.7%	9.7%	10.9%	43.4%	2.9%	16.2%	37.7%
	-18.5; 43.8	-9.8; 49.6	8.2; 79.7	-36.9; 79.1	-33.9; 73.1	-11.8; 117.0	-26.5; 38.6	-14.5; 54.8	4.6; 82.7
>=65	9.3%	10.7%	18.3%	15.4%	36.1%	11.9%	6.6%	-1.9%	22.1%
	-9.2; 34.4	-7.8; 36.4	-2.9; 46.8	-21.1; 73.9	-6.3; 97.0	-22.6; 64.6	-15.5; 34.5	-24.7; 20.8	-2.4; 57.4
